# Supplementary material
Source: publisher site journal article supplement (https://www.dovepress.com/article/390996)
Supplement: Supplementary file 1 [file get_supplementary_file.php]

## **COVID-19 Vaccination Perception and Acceptance among Female Medical and Nursing students at Al-Azhar University, Egypt**

Dear Medical Student,

We would like first to thank you for taking this survey.

It focuses on perception of medical and nursing students toward COVID-19 vaccines and the factors acting either as motivators or barriers to be vaccinated.

Your valuable contribution would help us to precisely evaluate the status and formulate a vision for building a better future for raising awareness about vaccinations that may eventually improve perception and acceptance of COVID-19 vaccines in Egypt.

Please be ensured that anything you say in this form is strictly confidential and will only be used for research and development purposes.

Best wishes,

### **I-Personal data**

1-Name (Optional):

2- age (years):

3-Faculty:    Medicine   

Nursing   

4-Residence:    urban   

rural   

5- Marital status:    Single   

married   

6-Do you suffer from chronic diseases?

Yes   

No   

7- Did you have previous Covid-19 infection before?

Yes   

No   

8- What are the main sources of Covid-19 vaccine information (multiple choices):

-Social media

-Scientific website

-Healthcare workers

-Ministry of Health reports

-Pharmaceutical company reports

-National media (TV/radio)

-Friends

### **II-Perception toward Covid-19 vaccines**

- In your opinion:

1- **The vaccines are safe and effective?**

Completely Agree   

somewhat agree

Disagree

2- **COVID-19 vaccine can prevent infection?**

Completely Agree   

somewhat agree

Disagree

3-**There are less side effects from available Covid-19 vaccines**

Completely Agree   

somewhat agree

Disagree

4- **Do you think the rate of infection will decrease after vaccination?**

Completely Agree   

somewhat agree

Disagree

5-**Post vaccination immunity is better than post infection immunity**

Completely Agree   

somewhat agree

Disagree

**6-Complications of Covid-19 infection will decrease after vaccination**

Completely Agree  somewhat agree  Disagree

**7-Recovery rate of Covid-19 infection will increase after vaccination**

Completely Agree  somewhat agree  Disagree

**8-Herd immunity achieved through vaccination is the key to stop the pandemic**

Completely Agree  somewhat agree  Disagree

**9- Do you think that vaccination is the community responsibility?**

Completely Agree  somewhat agree  Disagree

**10- Do you think that preventive measures are sufficient to fight Covid-19?**

Completely Agree  somewhat agree  Disagree

**11- Do you think that even with vaccination other preventive measures are necessary?**

Completely Agree  somewhat agree  Disagree

**III-Acceptance of Covid-19 vaccines**

**1- Will you to take the vaccine at the earliest available date?**

- Hesitant (No/Undecided)
- Yes, I am willing
- Already vaccinated

**2-Will you motivate others to be vaccinated?**

- Yes
- Not sure
- No

**V-Open questions:**

- In my opinion the following are the reasons for getting Covid-19 vaccines
- In my opinion the following are the reasons for not getting Covid-19 vaccines
